# Supplementary material
Source: Springer Nature journal article supplement (https://www.springermedizin.de/resource/supplementary/12883_2011_506_MOESM1_ESM.pdf/9455290)

**m/z 4810**

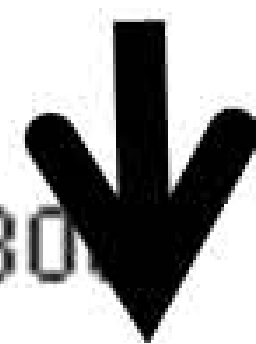

4700

4800

4900

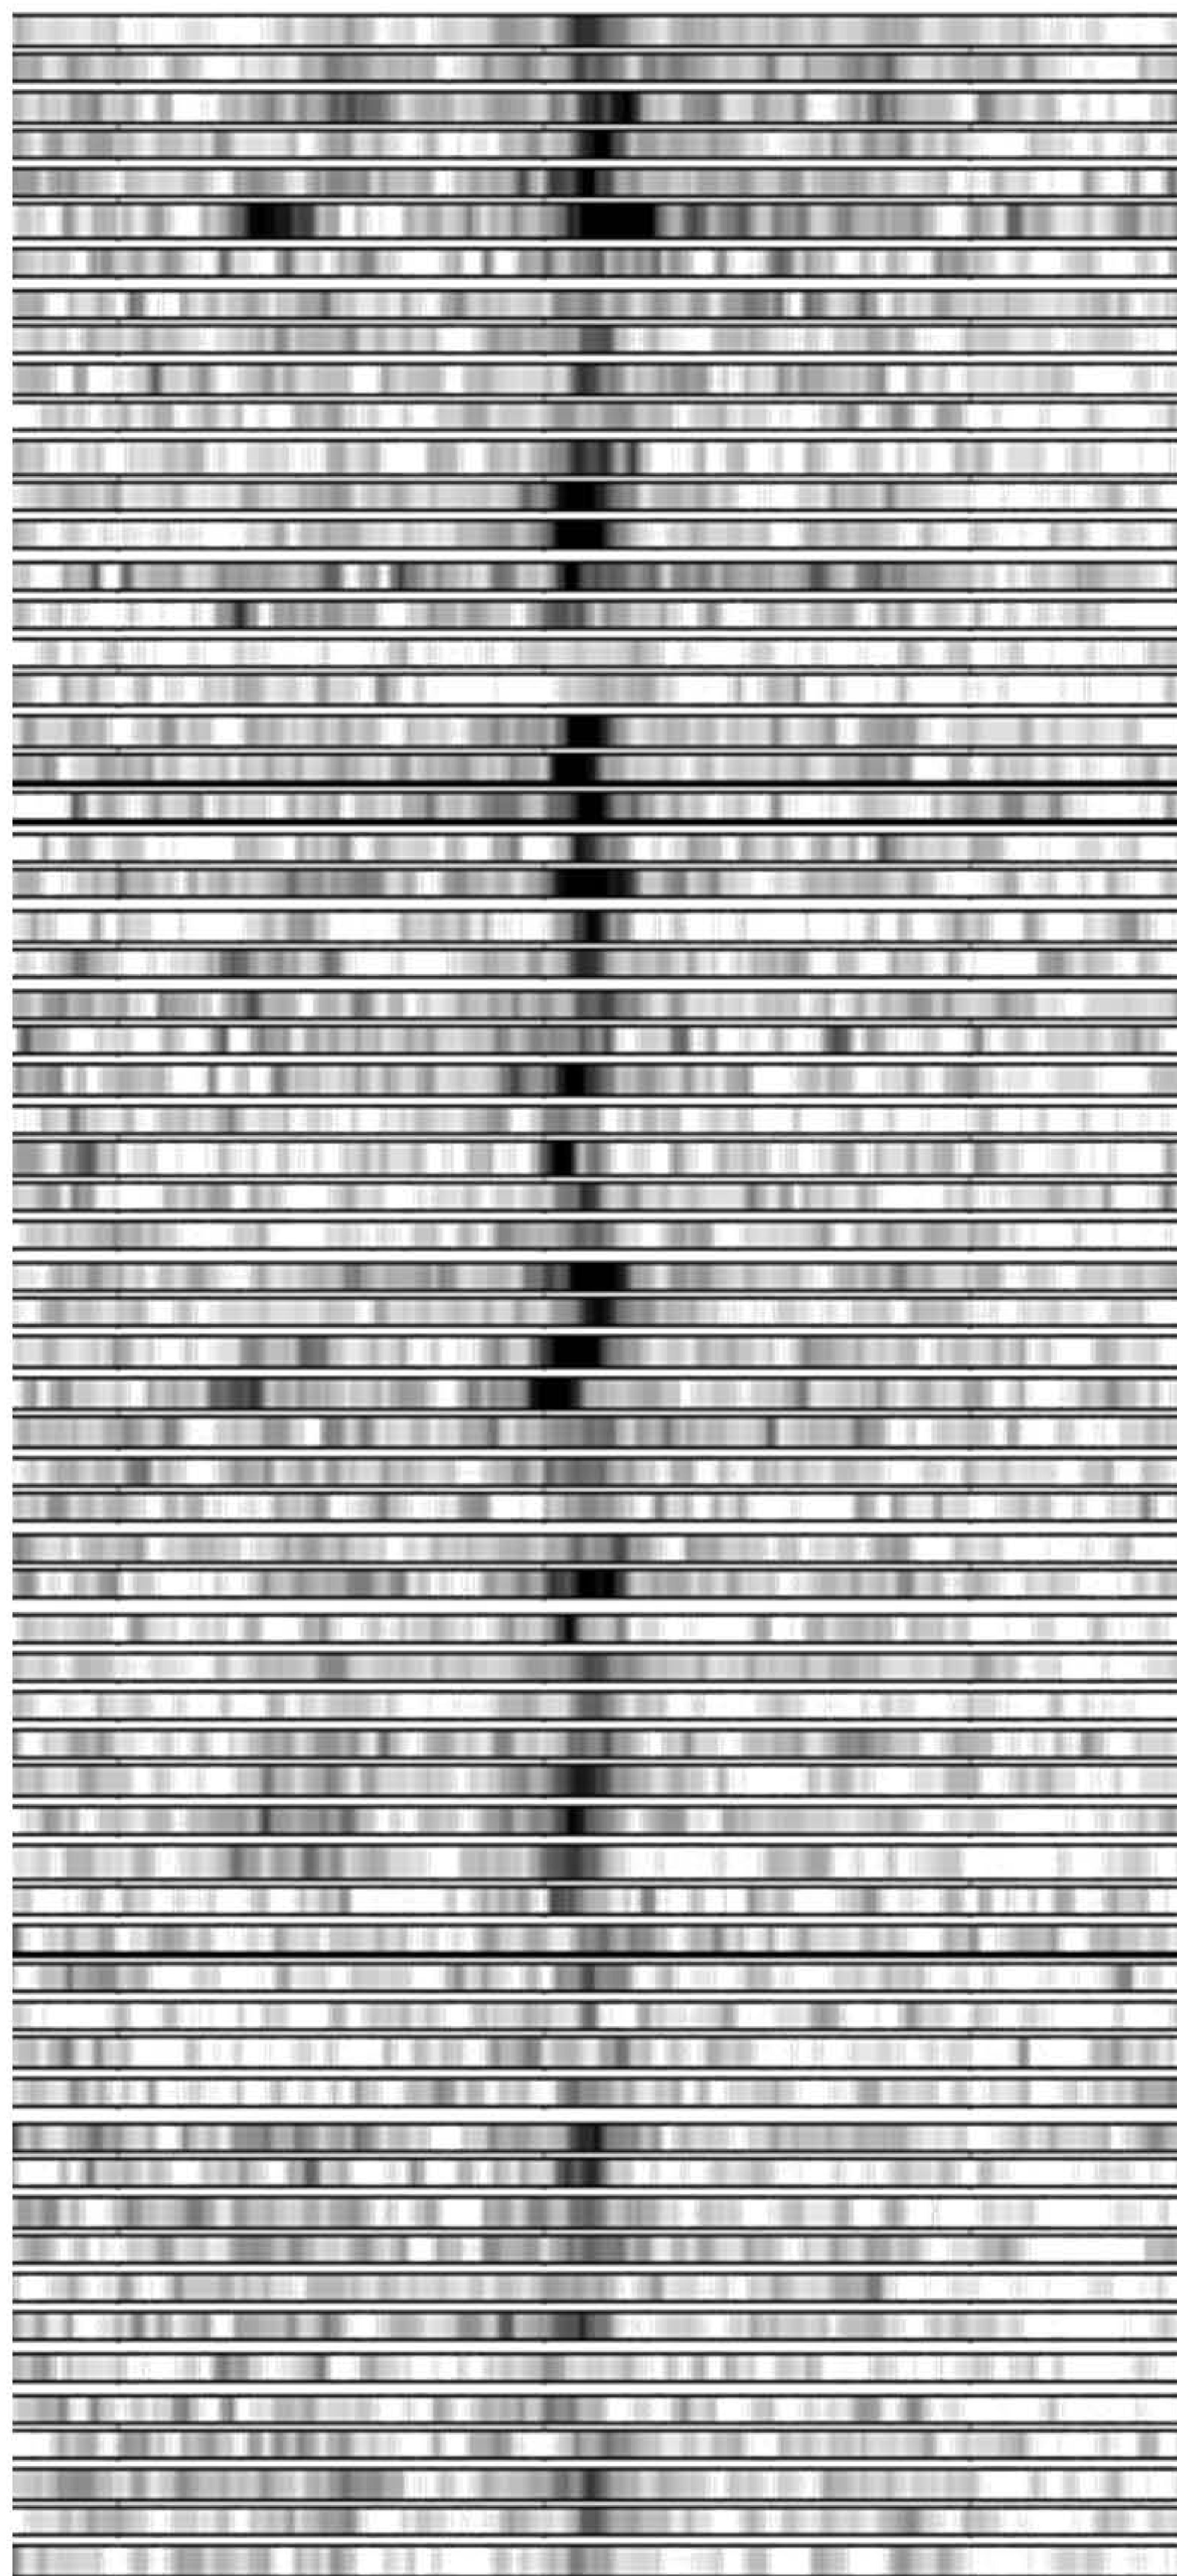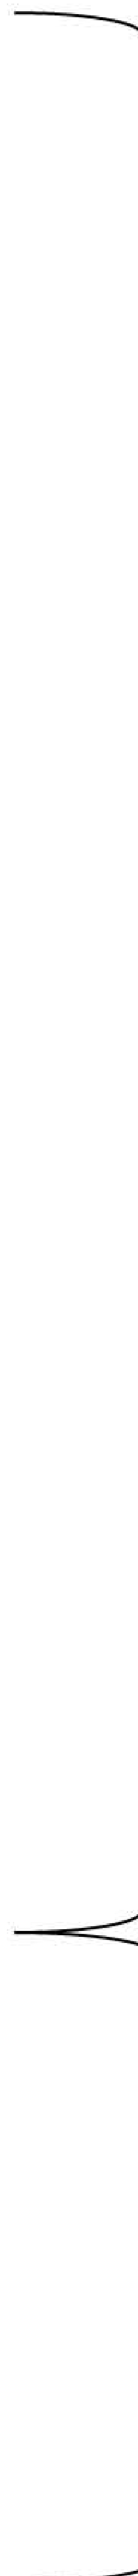

**Febrile Seizure**

**Encephalopathy**

4700

4800

4900

Supplement: MOESM1 [file 9455290]
